# Supplementary material for: N-cadherinis required for the polarized cell behaviors that drive neurulation in the zebrafish
Source: Oxford University Press journal article supplement (doi:10.1242/dev.02560), 2006-08-31
Supplement: dev02560tables.pdf [file dev02560tables.pdf]

**Table S1. Percentage of cells undergoing radial intercalation in wild-type, *N-cad*<sup>p79emcf</sup> mutant and *N-cad* morphant embryos**

|                  |                             | Lateral (dorsal) % |       |                 |         | Medial %      |        |       |                 |         |               |
|------------------|-----------------------------|--------------------|-------|-----------------|---------|---------------|--------|-------|-----------------|---------|---------------|
|                  |                             | Apical             | Basal | Both            | Neither | Embryo (cell) | Apical | Basal | Both            | Neither | Embryo (cell) |
| Wild type        | Plate (tb-1s)               | 30                 | 44    | 5               | 21      | 6 (171)       | 33     | 42    | 15              | 10      | 6 (110)       |
|                  | Keel (4-5s)                 | 22                 | 38    | 14              | 26      | 6 (172)       | 29     | 35    | 27              | 9       | 6 (101)       |
|                  | Rod (6-10s)                 | 21                 | 17    | 62              | 0       | 11 (61)       | 18     | 5     | 77              | 0       | 11 (60)       |
|                  | Late rod (12-13s)           | 3                  | 0     | 97              | 0       | 3 (35)        | 17     | 11    | 72              | 0       | 3 (18)        |
| <i>N-cad</i> /MO | Plate (MO; tb-1s)           | 37                 | 37    | 4               | 22      | 6 (196)       | 28     | 33    | 39*             | 0       | 6 (36)        |
|                  | Keel ( <i>N-cad</i> ; 4-5s) | 29                 | 39    | 11              | 21      | 6 (133)       | 28     | 15    | 57 <sup>§</sup> | 0       | 6 (47)        |
|                  | Keel (MO; 4-5s)             | 23                 | 27    | 44              | 6       | 5 (100)       | 40     | 19    | 41 <sup>¶</sup> | 0       | 5 (32)        |
|                  | Rod ( <i>N-cad</i> ; 6-10s) | 46                 | 28    | 24              | 2       | 7 (46)        | 21     | 4     | 75              | 0       | 7 (67)        |
|                  | Rod (MO; 6-10s)             | 48                 | 9     | 41              | 2       | 8 (85)        | 29     | 6     | 64              | 1       | 8 (66)        |
|                  | Late rod (MO; 12-13s)       | 36                 | 27    | 35 <sup>‡</sup> | 2       | 4 (45)        | 22     | 4     | 74 <sup>†</sup> | 0       | 4 (51)        |

Comparisons between the number of cells undergoing intercalation were made using the  $\chi^2$ -test. (Note: the analysis was performed on cell counts whereas the data shown above are presented as percentages.) Comparisons were statistically significant unless noted otherwise.

\* $\chi^2=9.05$ ,  $P<0.05$  when compared with wild-type embryos in the medial region at the neural plate (tb-1s) stage.

<sup>†</sup> $\chi^2=0.03$ ,  $P>0.05$  (not significant) when compared with wild-type embryos in the medial region at the late rod (12-13s) stage.

<sup>‡</sup> $\chi^2=31.80$ ,  $P<0.05$  when compared with wild-type embryos in the lateral (dorsal) region at the late rod (12-13s) stage.

<sup>§</sup> $\chi^2=13.09$ ,  $P<0.05$  when compared with wild-type embryos in the medial region at the neural keel (4-5s) stage.

<sup>¶</sup> $\chi^2=2.31$ ,  $P>0.05$  (not significant) when compared with wild-type embryos in the medial region at the neural keel (4-5s) stage.

**Table S2. Cell measurements in wild-type, *N-cad*<sup>p79emcf</sup> mutant and *N-cad* morphant embryos**

|              |               | Angle (°)                   |              |                | Length ( $\mu$ m) |              |                | LWR                        |               |                             | Embryo (cell) |
|--------------|---------------|-----------------------------|--------------|----------------|-------------------|--------------|----------------|----------------------------|---------------|-----------------------------|---------------|
|              |               | Ventral                     | Medial       | Lateral/dorsal | Ventral           | Medial       | Lateral/dorsal | Ventral                    | Medial        | Lateral/dorsal              |               |
| Wild type    | Plate (tb-1s) | 48 $\pm$ 15                 | 57 $\pm$ 5.8 | 78 $\pm$ 6.5   | 23 $\pm$ 3        | 28 $\pm$ 2.7 | 24 $\pm$ 3.8   | 3.2 $\pm$ 0.3              | 4.2 $\pm$ 0.6 | 3.5 $\pm$ 0.6               | 5 (52)        |
|              | Keel (4-5s)   | 11 $\pm$ 5.4                | 34 $\pm$ 6.6 | 25 $\pm$ 3.1*  | 30 $\pm$ 4.7      | 37 $\pm$ 2.9 | 41 $\pm$ 2.7   | 5 $\pm$ 0.8                | 7 $\pm$ 0.7   | 7.6 $\pm$ 0.6 <sup>†</sup>  | 7 (43)        |
|              | Rod (6-7s)    | 17 $\pm$ 3.8                | 19 $\pm$ 5.5 | 28 $\pm$ 3.5   | 39 $\pm$ 6        | 44 $\pm$ 4.5 | 35 $\pm$ 4.2   | 6.6 $\pm$ 1.4              | 7.6 $\pm$ 0.6 | 6 $\pm$ 0.7                 | 4 (30)        |
| <i>N-cad</i> | Plate (tb-1s) | –                           | –            | –              | –                 | –            | –              | –                          | –             | –                           | –             |
|              | Keel (4-5s)   | 8.4 $\pm$ 2.4               | 44 $\pm$ 12  | 65 $\pm$ 8.5** | 29 $\pm$ 2.6      | 35 $\pm$ 2.5 | 34 $\pm$ 4     | 5 $\pm$ 1                  | 6.3 $\pm$ 1.3 | 4.4 $\pm$ 0.6 <sup>††</sup> | 5 (40)        |
|              | Rod (6-7s)    | 18 $\pm$ 5.7                | 45 $\pm$ 6.9 | 67 $\pm$ 12.4  | 24 $\pm$ 2.5      | 36 $\pm$ 5.8 | 32 $\pm$ 4.1   | 4.3 $\pm$ 0.6 <sup>¶</sup> | 5.2 $\pm$ 1.2 | 4.1 $\pm$ 0.9 <sup>‡‡</sup> | 4 (27)        |
| MO           | Plate (tb-1s) | 19 $\pm$ 5.2 <sup>‡</sup>   | 50 $\pm$ 7.6 | 76 $\pm$ 4.2   | 25 $\pm$ 2.7      | 27 $\pm$ 2.5 | 26 $\pm$ 2     | 4.3 $\pm$ 0.7 <sup>§</sup> | 4 $\pm$ 0.6   | 3.6 $\pm$ 0.3               | 9 (65)        |
|              | Keel (4-5s)   | 5.2 $\pm$ 1.8 <sup>§§</sup> | 53 $\pm$ 6.4 | 63 $\pm$ 8.8** | 34 $\pm$ 8.1      | 33 $\pm$ 3.6 | 36 $\pm$ 3.5   | 5.1 $\pm$ 1.2              | 4.8 $\pm$ 0.8 | 4.9 $\pm$ 0.7 <sup>††</sup> | 4 (77)        |
|              | Rod (6-7s)    | 23 $\pm$ 6                  | 43 $\pm$ 8.3 | 69 $\pm$ 4.7   | 25 $\pm$ 1.9      | 38 $\pm$ 4.6 | 33 $\pm$ 2.7   | 4.8 $\pm$ 0.4              | 5.9 $\pm$ 0.9 | 5 $\pm$ 0.6                 | 5 (31)        |

ANOVA was used to analyze the cell measurements. A Tukey post-hoc test was used to distinguish significant pair-wise differences between averages. Comparisons were statistically significant unless noted otherwise. Values are shown as mean $\pm$ s.e.m.

\* $F_{2,40}=15.39$ ,  $P<0.05$  when comparing cell angle with wild-type embryos in the ventral region of the neural plate (tb-1s) stage.

<sup>†</sup> $F_{2,52}=31.69$ ,  $P<0.05$  when comparing cell LWR with wild-type embryos in the dorsal region of the neural plate (tb-1s) stage.

<sup>‡</sup> $F_{1,15}=11.45$ ,  $P<0.05$  when comparing cell angle with wild-type embryos in the ventral region of the neural plate (tb-1s) stage.

<sup>§</sup> $P>0.05$  (not significant) when comparing cell LWR with wild-type embryos in the ventral region of the neural plate (tb-1s) stage.

<sup>¶</sup> $F_{2,29}=4.88$ ,  $P<0.05$  when comparing cell LWR with wild-type embryos in the ventral region of the neural rod (6-7s) stage.

\*\* $F_{2,88}=33.45$ ,  $P<0.05$  when comparing cell angle with wild-type embryos in the dorsal region of the neural keel (4-5s) stage.

<sup>††</sup> $F_{2,88}=17.60$ ,  $P<0.05$  when comparing cell LWR with wild-type embryos in the dorsal region of the neural keel (4-5s) stage.

<sup>‡‡</sup> $F_{2,25}=3.29$ ,  $P<0.05$  when comparing cell LWR with wild-type embryos in the dorsal region of the neural rod (6-7s) stage.

<sup>§§</sup> $P>0.05$  (not significant) when comparing cell angle with wild-type embryos in the ventral region of the neural keel (4-5s) stage.

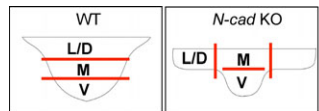

D: Dorsal  
L: Lateral  
M: Medial  
V: Ventral
